# Supplementary material
Source: HighWire-hosted journal article supplement (https://bmjopengastro.bmj.com/content/7/1/e000348)
Supplement: inline-supplementary-material-1 [file inline-supplementary-material-1.pdf]

**Supplementary Materials**

**Supplementary Table 1.** Expert panel composition

**Supplementary Table 2.** Preliminary practice recommendations and results of the first round of voting. Twenty-nine panelists voted on the preliminary practice recommendations

**Supplementary Table 3.** Level of agreement for the final practice recommendations.

**Supplementary Table 1.** Multidisciplinary Panel Composition

| <b>Specialty</b>    | <b>Attendee</b>   | <b>Affiliation</b>                                                                                                                                                                                                                               |
|---------------------|-------------------|--------------------------------------------------------------------------------------------------------------------------------------------------------------------------------------------------------------------------------------------------|
| <b>Anesthesia</b>   | Eric Goldszmidt   | Assistant Professor, Dept. of Anesthesia, University of Toronto<br>Deputy Anesthesiologist-in-Chief, Mount Sinai Hospital                                                                                                                        |
|                     | Matt Kurrek       | Associate Professor, Department of Anesthesia, University of Toronto                                                                                                                                                                             |
|                     | Sue Belo          | Chair, Medical Advisory Committee<br>Anesthesiologist-in-Chief, Sunnybrook Health Sciences Centre                                                                                                                                                |
|                     | Fred Baxter       | Associate Clinical Professor, Division of Clinical Care, Department of Anesthesia, McMaster University                                                                                                                                           |
|                     | Brent Kennedy     | Chair of Anesthesia, Northern Ontario School of Medicine, Health Sciences North                                                                                                                                                                  |
| <b>Endoscopists</b> | Roland Valori     | Clinical Advisor, Healthcare Quality Improvement Partnership<br>London Clinical Lead for CRC, Public Health England                                                                                                                              |
|                     | Jason A. Dominitz | National Program Director for Gastroenterology, Department of Veteran's Affairs<br>Gastroenterology Section Chief, VA Puget Sound Health System<br>Professor of Medicine, Gastroenterology Division, University of Washington School of Medicine |
|                     | Chris Vinden      | Associate Professor, Department of Surgery, University of Western Ontario                                                                                                                                                                        |
|                     | David Armstrong   | Gastroenterologist, Hamilton Health Sciences, McMaster University                                                                                                                                                                                |
|                     | Stan Feinberg     | Medical Director, Ambulatory and Cancer Care Program, North York General Hospital                                                                                                                                                                |

|                               |                   |                                                                                                                                                           |
|-------------------------------|-------------------|-----------------------------------------------------------------------------------------------------------------------------------------------------------|
|                               | Iain Murray       | President, Ontario Association of Gastroenterology                                                                                                        |
|                               | Clarence Wong     | Medical Lead, Alberta Colorectal Cancer Screening Program                                                                                                 |
|                               | Andrew Bellini    | Regional Lead, Colorectal/GI Endoscopy, Mississauga Halton Central West Regional Cancer Program                                                           |
|                               | Robert J. Hilsden | Associate Professor, Cumming School of Medicine, University of Calgary<br>Director of Research, Alberta Health Services<br>Colon Cancer Screening Program |
| <b>Cancer Care Ontario</b>    | Nancy Baxter      | GI Endoscopy Provincial Lead, Cancer Care Ontario<br>Professor of Surgery, University of Toronto                                                          |
|                               | Catherine Dubé    | Clinical Lead, ColonCancerCheck Program<br>Associate Professor, Department of Medicine, Division of Gastroenterology, University of Ottawa                |
|                               | Jill Tinmouth     | Scientific Lead, ColonCancerCheck<br>Staff Physician, Sunnybrook Health Sciences Centre                                                                   |
|                               | David Morgan      | Provincial Lead, Colonoscopy Quality Management Program<br>Associate Professor, Division of Gastroenterology, Department of Medicine, McMaster University |
| <b>Public Representatives</b> | Roslyn Doctorow   | Volunteer Patient and Family Advisor<br>Cancer Care Ontario                                                                                               |
|                               | Anne Newman       | Volunteer Patient and Family Advisor<br>Cancer Care Ontario                                                                                               |
|                               | Steve Payne       | Volunteer Patient and Family Advisor<br>Cancer Care Ontario                                                                                               |
| <b>Administrators/Funders</b> | Michael Klar      | Medical Consultant, Negotiations Branch, Ministry of Health and Long Term Care                                                                            |

|                                            |                   |                                                                                                                                             |
|--------------------------------------------|-------------------|---------------------------------------------------------------------------------------------------------------------------------------------|
|                                            | Tim Rice          | Director, Medicine and Family Medicine Services, London Health Sciences Centre – Victoria Hospital                                          |
|                                            | Farah Khan        | Regional Director, Mississauga Halton Central West Regional Cancer Program                                                                  |
| <b>Health Economics Experts</b>            | Nicole Mittman    | Chief Research Officer, Analytics & Informatics, Cancer Care Ontario                                                                        |
|                                            | Beate Sander      | Director of Population Health Economics, Toronto Health Economics and Technology Assessment (THETA) Collaborative, Toronto General Hospital |
| <b>Endoscopy Nursing</b>                   | Claudette Booth   | Manager, Clinical Programs, Humber River Regional Hospital                                                                                  |
|                                            | Jacque Ho         | Interim Director of Surgery, Orthopedics, MDRD & Rehabilitation, Scarborough and Rouge Valley Hospitals                                     |
|                                            | Mae Burke         | Clinical Leader Manager, Therapeutic Endoscopy, St. Michael's Hospital                                                                      |
| <b>Hospital Endoscopy Program Managers</b> | Adam Lamoureux    | Corporate Program Manager, Endoscopy Program, The Ottawa Hospital                                                                           |
|                                            | Dianne Pletz      | Program Manager, Endoscopy, St. Mary's General Hospital                                                                                     |
| <b>Regulators</b>                          | Shandelle Johnson | Manager, Practice Assessment & Enhancement Department, College of Physicians and Surgeons of Ontario                                        |

**Supplementary Table 2.** Preliminary practice recommendations and results of the first round of voting. Twenty-nine panelists voted on the preliminary practice recommendations

| <b>Preliminary Practice Recommendations</b>                                                                                                                         | <b>Number of respondents</b> | <b>Strongly agree/agree</b> | <b>Unsure</b> | <b>Disagree/Strongly Disagree</b> | <b>No opinion/lack of expertise</b> |
|---------------------------------------------------------------------------------------------------------------------------------------------------------------------|------------------------------|-----------------------------|---------------|-----------------------------------|-------------------------------------|
| All endoscopists should be able to perform routine colonoscopy safely and effectively on most patients using moderate sedation                                      | 29                           | 90%                         | 3%            | 7%                                | 0%                                  |
| Endoscopists unable to perform colonoscopy safely and effectively with moderate sedation should undergo additional training                                         | 27                           | 81%                         | 11%           | 4%                                | 4%                                  |
| For routine colonoscopy, endoscopists can safely administer moderate sedation                                                                                       | 27                           | 78%                         | 7%            | 11%                               | 4%                                  |
| For routine in-hospital colonoscopy under moderate sedation, a single RN can monitor the patient and perform brief interruptible tasks                              | 27                           | 74%                         | 11%           | 15%                               | 0%                                  |
| Select patients undergoing routine colonoscopy may benefit from deep sedation                                                                                       | 27                           | 89%                         | 7%            | 0%                                | 4%                                  |
| For routine colonoscopy, deep sedation should not be institutionally mandated                                                                                       | 27                           | 85%                         | 7%            | 4%                                | 4%                                  |
| Deep sedation for colonoscopy should only be administered by an anesthesia provider                                                                                 | 27                           | 82%                         | 11%           | 7%                                | 0%                                  |
| For colonoscopy under deep sedation, an anesthesia provider should be responsible for monitoring the patient and should not be responsible for any additional tasks | 27                           | 85%                         | 11%           | 4%                                | 0%                                  |
| Select patients undergoing colonoscopy benefit from having sedation administered and monitored by an anesthesia provider, irrespective of level of sedation         | 27                           | 67%                         | 18%           | 11%                               | 4%                                  |

**Supplementary Table 3.** Level of agreement for the final practice recommendations.

| <b>Final Practice Recommendations</b>                                                                                                                                                                     | <b>Number of respondents</b> | <b>Strongly agree/agree</b> | <b>Unsure</b> | <b>Disagree/Strongly Disagree</b> | <b>No opinion/lack of expertise</b> |
|-----------------------------------------------------------------------------------------------------------------------------------------------------------------------------------------------------------|------------------------------|-----------------------------|---------------|-----------------------------------|-------------------------------------|
| All endoscopists performing colonoscopy should be able to complete colonoscopy safely and effectively (per accepted benchmarks) using moderate sedation or less                                           | 28                           | 93%                         | 0%            | 3.5%                              | 3.5%                                |
| Endoscopists unable to complete colonoscopy safely and effectively (per accepted benchmarks) using moderate sedation should undergo additional training                                                   | 28                           | 89%                         | 7%            | 4%                                | 0%                                  |
| For patients undergoing routine colonoscopy, endoscopists can safely administer moderate sedation with the assistance of a trained nurse                                                                  | 28                           | 89%                         | 7%            | 4%                                | 0%                                  |
| For routine in-hospital colonoscopy under moderate sedation, a single RN* can both monitor the patient and perform brief interruptible tasks                                                              | 28                           | 86%                         | 3%            | 11%                               | 0%                                  |
| Select patients undergoing routine colonoscopy may benefit from deep sedation                                                                                                                             | 28                           | 93%                         | 3.5%          | 0%                                | 3.5%                                |
| Institutions will not mandate the use of deep sedation for routine colonoscopy                                                                                                                            | 28                           | 93%                         | 0%            | 3.5%                              | 3.5%                                |
| Deep sedation for colonoscopy should only be administered by an anesthesia provider                                                                                                                       | 28                           | 82%                         | 11%           | 7%                                | 0%                                  |
| For routine colonoscopy under deep sedation, an anesthesia provider will be responsible for monitoring the patient and should not be responsible for additional tasks                                     | 27                           | 93%                         | 3.5%          | 3.5%                              | 0%                                  |
| Select patients undergoing colonoscopy, such as those with severe comorbidities, may benefit from having sedation administered and monitored by an anesthesia provider, irrespective of level of sedation | 27                           | 96%                         | 0%            | 4%                                | 0%                                  |
